# Supplementary material for: Genome-Based Analysis of Virulence Factors and Biofilm Formation in Novel P. aeruginosa Strains Isolated from Household Appliances
Source: MDPI journal article supplement (doi:10.3390/microorganisms10122508), 2022-12-19
Supplement: s1 [file s1]

# Supplementary Material

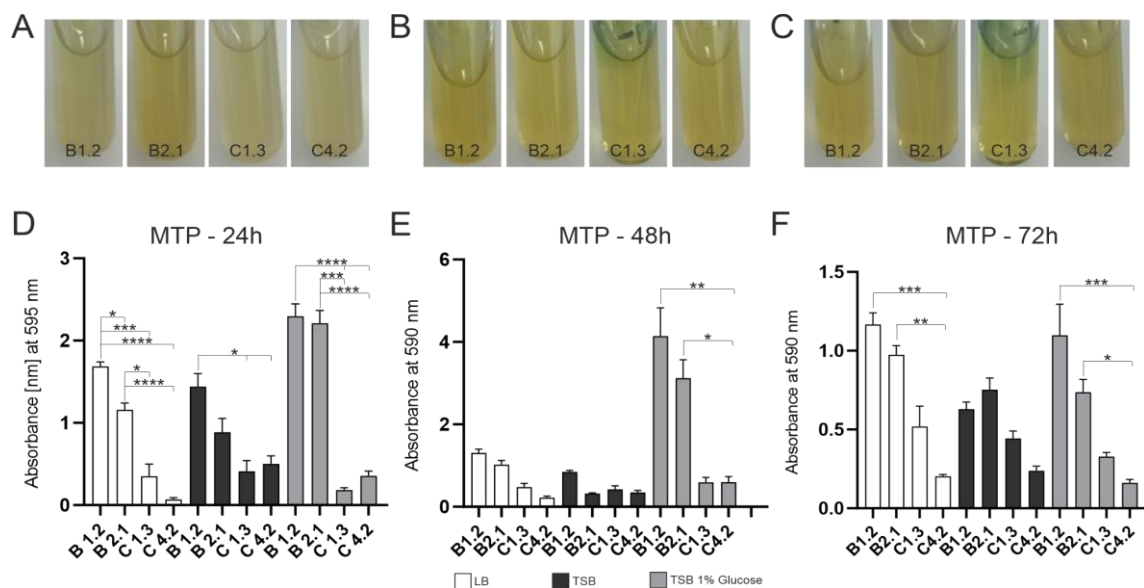

**Figure S1.** Investigation of *Pseudomonas aeruginosa* growth behavior and biofilm formation. *P. aeruginosa* isolates were incubated without agitation for 72h and pictures were taken every 24h (A: 24h, B: 48h, 72h). Additionally, biofilm formation was tested after 24h, 48h and 72h by the microtiter plate assay (D-F). Means  $\pm$  SEM were statistically analyzed by Brown-Forsythe, Welch ANOVA tests ( $p < 0.05$  (\*),  $p < 0.01$  (\*\*),  $p < 0.001$  (\*\*\*),  $p < 0.0001$  (\*\*\*\*)), Data in D passed the D'Agostino & Pearson normality test ( $\alpha=0.05$ ). E and F did not passed D'Agostino and Pearson normality test, Means  $\pm$  SEM were analyzed by Kuskal Wallis-test ( $p < 0.05$  (\*),  $p < 0.01$  (\*\*),  $p < 0.001$  (\*\*\*),  $p < 0.0001$  (\*\*\*\*)).

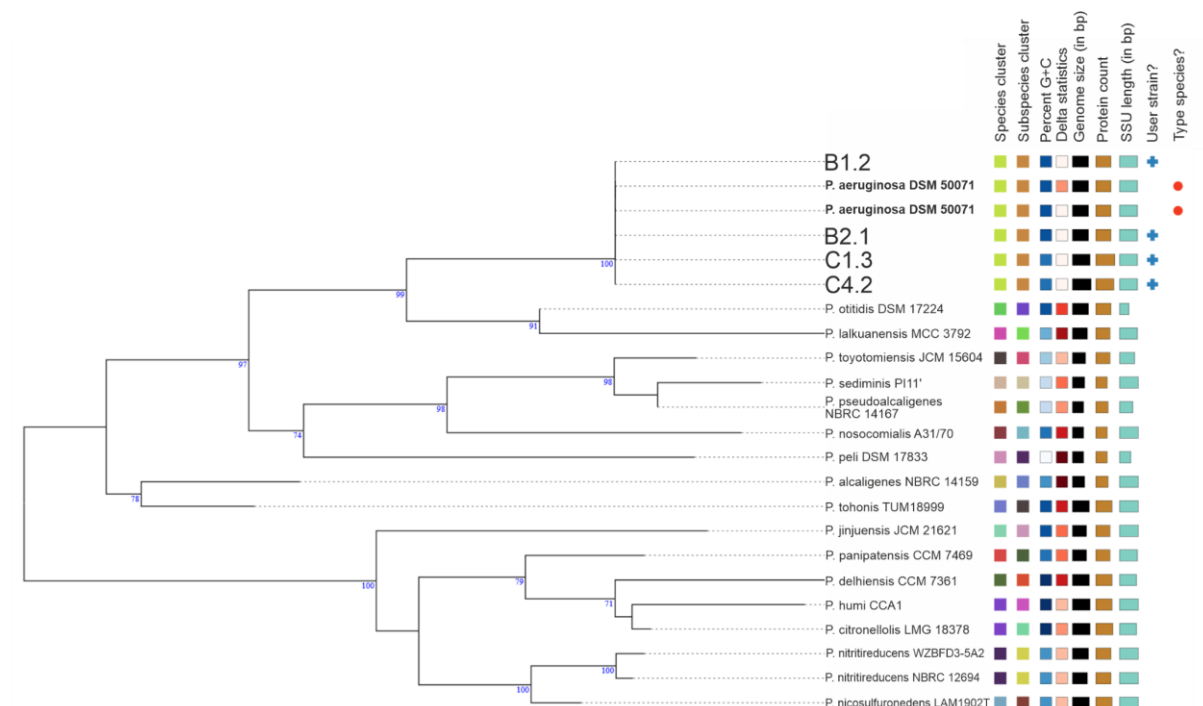

**Figure S2.** 16S rRNA tree. The 16S rRNA sequences were used for additional taxonomic classification of the strains. Phylogenetic 16S rRNA gene sequence tree and Genome-scale GBDP tree (Figure. 1) reveals that the four WM isolates belong to the species *P. aeruginosa*. Generated by using the type (strain) genome server (TYGS) [46,47].

**Table S1.** List of Prophages. Identified with PHASTER web tool.

| Region        | Region Length | Completeness | Score | # Total Proteins | Region Position | Most Common Phage                           | GC %   |
|---------------|---------------|--------------|-------|------------------|-----------------|---------------------------------------------|--------|
| <b>B1.2</b>   |               |              |       |                  |                 |                                             |        |
| 1             | 29.8Kb        | incomplete   | 20    | 11               | 630129-660002   | PHAGE_Klebsi_ST13_OXA48phi12.1_NC_049453(4) | 65.14% |
| 2             | 18.4Kb        | questionable | 80    | 24               | 679164-697633   | PHAGE_Pseudo_phiCTX_NC_003278(6)            | 65.01% |
| 3             | 54.9Kb        | intact       | 120   | 68               | 2595731-2650671 | PHAGE_Pseudo_phi297_NC_016762(42)           | 63.31% |
| 4             | 18.4Kb        | questionable | 75    | 17               | 4273897-4292390 | PHAGE_Pseudo_Pf1_NC_001331(7)               | 60.00% |
| 5             | 11.6Kb        | questionable | 75    | 15               | 4782027-4793711 | PHAGE_Pseudo_Pf1_NC_001331(7)               | 54.89% |
| 6             | 13.2Kb        | questionable | 85    | 19               | 5307963-5321244 | PHAGE_Pseudo_Pf1_NC_001331(8)               | 55.43% |
| 7             | 46.2Kb        | intact       | 137   | 56               | 5884615-5930832 | PHAGE_Pseudo_Dobby_NC_048109(45)            | 63.27% |
| <b>B2.1</b>   |               |              |       |                  |                 |                                             |        |
| 1             | 29.8Kb        | incomplete   | 20    | 11               | 630129-660002   | PHAGE_Klebsi_ST14_7_VIM1phi7.1_NC_049451(4) | 65.14% |
| 2             | 18.4Kb        | questionable | 80    | 24               | 679164-697633   | PHAGE_Pseudo_Dobby_NC_048109(6)             | 65.01% |
| 3             | 54.9Kb        | intact       | 120   | 68               | 2595731-2650671 | PHAGE_Pseudo_phi297_NC_016762(42)           | 63.31% |
| 4             | 18.4Kb        | questionable | 75    | 17               | 4273884-4292377 | PHAGE_Pseudo_Pf1_NC_001331(7)               | 60.00% |
| 5             | 11.6Kb        | questionable | 75    | 15               | 4782014-4793698 | PHAGE_Pseudo_Pf1_NC_001331(7)               | 54.89% |
| 6             | 13.2Kb        | questionable | 85    | 19               | 5307950-5321231 | PHAGE_Pseudo_Pf1_NC_001331(8)               | 55.43% |
| 7             | 46.2Kb        | intact       | 137   | 56               | 5884602-5930819 | PHAGE_Pseudo_Dobby_NC_048109(45)            | 63.27% |
| <b>C1.3_1</b> |               |              |       |                  |                 |                                             |        |
| 1             | 17.2Kb        | incomplete   | 40    | 7                | 614001-631219   | PHAGE_Enterofia91_ss_NC_022750(2)           | 62.98% |

|   |        |              |     |    |                 |                                                 |        |
|---|--------|--------------|-----|----|-----------------|-------------------------------------------------|--------|
| 2 | 32.3Kb | intact       | 150 | 41 | 663492-695885   | PHAGE_Pseudo_YM<br>C11/02/R656_NC_028<br>657(8) | 64.01% |
| 3 | 42.5Kb | intact       | 98  | 61 | 1695503-1738089 | PHAGE_Pseudo_MD<br>8_NC_031091(42)              | 61.66% |
| 4 | 47.2Kb | intact       | 110 | 65 | 1881037-1928240 | PHAGE_Pseudo_phi<br>2_NC_030931(33)             | 62.66% |
| 5 | 41.2Kb | questionable | 80  | 54 | 3393486-3434699 | PHAGE_Pseudo_JBD<br>93_NC_030918(29)            | 64.93% |
| 6 | 8.5Kb  | incomplete   | 30  | 8  | 3759540-3768078 | PHAGE_Escher_5208<br>73_NC_049344(2)            | 64.23% |
| 7 | 11.3Kb | questionable | 85  | 9  | 5382117-5393466 | PHAGE_Pseudo_Pf1_<br>NC_001331(8)               | 56.68% |
| 8 | 12.1Kb | incomplete   | 30  | 19 | 5752075-5764220 | PHAGE_Stx2_c_1717<br>_NC_011357(2)              | 62.50% |

### C1.3\_2

|   |        |            |    |    |               |                                    |        |
|---|--------|------------|----|----|---------------|------------------------------------|--------|
| 1 | 6.9Kb  | incomplete | 30 | 10 | 138368-145290 | PHAGE_Stenot_Mob<br>y_NC_048802(1) | 57.24% |
| 2 | 25.2Kb | incomplete | 40 | 17 | 147690-172969 | PHAGE_Pseudo_H66<br>_NC_042342(3)  | 61.48% |
| 3 | 9.3Kb  | incomplete | 40 | 13 | 167832-177160 | PHAGE_Salmon_SJ46<br>_NC_031129(2) | 60.53% |

### C1.3\_3

|   |        |        |     |    |            |                                                |        |
|---|--------|--------|-----|----|------------|------------------------------------------------|--------|
| 1 | 32.4Kb | intact | 150 | 51 | 2921-35389 | PHAGE_Vibrio_vB_V<br>paM_MAR_NC_0197<br>22(13) | 63.97% |
|---|--------|--------|-----|----|------------|------------------------------------------------|--------|

### C4.2

|   |        |              |     |    |                 |                                                    |        |
|---|--------|--------------|-----|----|-----------------|----------------------------------------------------|--------|
| 1 | 16.1Kb | incomplete   | 20  | 12 | 684759-700920   | PHAGE_Klebsi_ST14<br>7_VIM1phi7.1_NC_04<br>9451(4) | 64.15% |
| 2 | 18.4Kb | questionable | 90  | 24 | 733539-752010   | PHAGE_Pseudo_phi<br>CTX_NC_003278(6)               | 64.96% |
| 3 | 52.6Kb | intact       | 120 | 62 | 933322-985987   | PHAGE_Pseudo_F10<br>_NC_007805(37)                 | 62.67% |
| 4 | 38.8Kb | intact       | 109 | 56 | 1729615-1768453 | PHAGE_Pseudo_JBD<br>5_NC_020202(43)                | 64.43% |
| 5 | 40.9Kb | intact       | 130 | 31 | 2464911-2505844 | PHAGE_Stx2_c_Stx2a<br>_F451_NC_049924(3)           | 61.31% |

|    |        |              |     |    |                 |                                           |        |
|----|--------|--------------|-----|----|-----------------|-------------------------------------------|--------|
| 6  | 28.3Kb | intact       | 150 | 38 | 2555514-2583850 | PHAGE_Escher_vB_EcoM_ECOO78_NC_041926(6)  | 63.28% |
| 7  | 60.2Kb | intact       | 150 | 84 | 2796339-2856539 | PHAGE_Pseudo_phi_297_NC_016762(41)        | 61.81% |
| 8  | 41.2Kb | intact       | 140 | 59 | 3264990-3306280 | PHAGE_Pseudo_JD0_24_NC_024330(29)         | 64.71% |
| 9  | 37.1Kb | intact       | 102 | 53 | 3720332-3757444 | PHAGE_Pseudo_JBD_88a_NC_020200(37)        | 64.35% |
| 10 | 65.9Kb | intact       | 150 | 97 | 3914478-3980454 | PHAGE_Pseudo_YM_C11/02/R656_NC_028657(55) | 59.66% |
| 11 | 36.1Kb | intact       | 102 | 52 | 4047926-4084080 | PHAGE_Pseudo_JBD_88a_NC_020200(37)        | 64.29% |
| 12 | 35.4Kb | incomplete   | 50  | 11 | 4483100-4518522 | PHAGE_Escher_5034_58_NC_049341(2)         | 64.34% |
| 13 | 7.3Kb  | incomplete   | 60  | 9  | 5161326-5168642 | PHAGE_Synech_Bell_amy_NC_047838(3)        | 55.31% |
| 14 | 27.2Kb | questionable | 70  | 8  | 5360224-5387483 | PHAGE_Escher_5034_58_NC_049341(2)         | 57.98% |
| 15 | 11Kb   | incomplete   | 40  | 14 | 5385270-5396289 | PHAGE_Burkho_phi_1026b_NC_005284(4)       | 58.85% |
| 16 | 12.1Kb | incomplete   | 50  | 12 | 5589745-5601891 | PHAGE_Strept_YDN_12_NC_028974(1)          | 65.09% |
| 17 | 28.4Kb | intact       | 100 | 18 | 6780196-6808606 | PHAGE_Stx2_c_Stx2a_F451_NC_049924(3)      | 56.80% |
| 18 | 13.7Kb | incomplete   | 60  | 10 | 6966057-6979809 | PHAGE_Shigel_SfII_NC_021857(1)            | 58.90% |
| 19 | 7.3Kb  | incomplete   | 60  | 9  | 7299742-7307058 | PHAGE_Synech_Bell_amy_NC_047838(3)        | 55.31% |

---

```

bci          ATGTTGATCTTGACCCGCCGCCGCCGCGAAACCTGCATATCGGCGACAACATCACCGTC 60
phi297_NC_016762.1 ATGCTGATCTTTGACCCGCCGCCGCCGCGAAACCTGCATATCGGCGACAACATCACCGTC 60
phi297_B1.2    ATGCTGATCTCTACCCGCCGAGTCGGCGAAACCTGCATATCGGCGACAACATCACCGTC 60
phi297_B2.1    ATGCTGATCTCTACCCGCCGAGTCGGCGAAACCTGCATATCGGCGACAACATCACCGTC 60
phi297_C4.2    ATGCTGATCTCTACCAAGAAGCCGCCGCGAAACCTGCATATCGGCGACAACATCACCGTC 60
                ***   *****   *   ***,*,*,*   *****   *****   **

bci          ACGGTCCTCGGCAGCCAGGGCGACCAAGGTGCGCCTCGGCATCACCGCCCCGGACGACGTC 120
phi297_NC_016762.1 ACGGTCCTCAGCAGCCAGGGCGACCAAGGTGCGCCTCGGCATCACCGCCCCGGACGACGTC 120
phi297_B1.2    ACGGTCCTCGGCAGCCAGGGCGACCAAGGTGCGCCTCGGCATCACCGCCCCGGACGACGTC 120
phi297_B2.1    ACGGTCCTCGGCAGCCAGGGCGACCAAGGTGCGCCTCGGCATCACCGCCCCGGACGACGTC 120
phi297_C4.2    ACGGTCCTCGGCAGCCAGGGCGACCAAGGTGCGCCTCGGCATCACCGCCCCGGACGACGTC 120
                *****   *****   *****   *****   *****

bci          GCCATCCACCGCTCCGAGATCTACCAAGCAGATCGGCAACGTCCGACCGGTGCCGCCGCCG 180
phi297_NC_016762.1 GCCATCCACCGCTCCGAGATCTACCAAGCAGATTGGCAACGTCCGTCGGGTGCCGCCGCCG 180
phi297_B1.2    GCCATTCACCGCTCCGAGATCTACCAAGCAGATCGGCAACGTCCGACCGGTGCCGCCGCCG 180
phi297_B2.1    GCCATTACCGCTCCGAGATCTACCAAGCAGATCGGCAACGTCCGACCGGTGCCGCCGCCG 180
phi297_C4.2    GCCATCCACCGCTCCGAGATCTACCAAGCAGATCGGCAACGTCCGACCGGTGCCGCCGCCG 180
                *****   *****   *****   *****   *****

bci          GAACTGGTCGAGGCTGGAACCGCGAGCACCCGGCGCCAGCGCTGATCGAGTACCGCCCG 240
phi297_NC_016762.1 GAGCTGGTCGAGGCTGGAACCGAGAGCACCCGGCGCCAGCGCTGATCGAATACCGCCCG 240
phi297_B1.2    GAACTGGTCGAAGCTGGAACCGAGAGCACCCGGCGCCAGCGCTGATCGAATACCGCCCG 240
phi297_B2.1    GAACTGGTCGAAGCTGGAACCGAGAGCACCCGGCGCCAGCGCTGATCGAATACCGCCCG 240
phi297_C4.2    GAACTGGTCGAGGCTGGAACCGAGAGCACCCAGCGCCAGCGCTGATCGAGTACCGCCCG 240
                **   *****   *****   *****   *****   *****   **

bci          TACCGAGGGGCCGAAACCGCAGCGCACCCGCAACCGTCGGCCGGGCCAGCGTGTGCTTGCC 300
phi297_NC_016762.1 TACCGCGGGGCCGAAACCGCAGCGCACCCGCAACCGTCGGCCGGGCCAGCGTGTGCTTGCC 300
phi297_B1.2    TACCGCGGGGCCGAAACCGCAGCGCACCCGCAACCGTCGGCCGGGCCAGCGTGTGCTTGCC 300
phi297_B2.1    TACCGCGGGGCCGAAACCGCAGCGCACCCGCAACCGTCGGCCGGGCCAGCGTGTGCTTGCC 300
phi297_C4.2    TACCGAGGGGCCGAAACCGCAGCGCACCCGCAACCGTCGGCCGGGCCAGCGTGTGCTTGCC 300
                *****   *****   *****   *****   *****   *****

bci          GGGGCGGCGGTTATCTGGATCGAAGGCCAGTCGGCGCCGGTGCGGTTGCGGGCCTGCACC 360
phi297_NC_016762.1 GGGGCGGCGGTTATCTGGATCGAAGGCCAATCGGCGCCGGTGCGGTTGCGGGCCTGCACC 360
phi297_B1.2    GGGGCGGCGGTTATCTGGATCGAAGGCCAGTCGGCGCCGGTGCGGTTGCGGGCCTGCACC 360
phi297_B2.1    GGGGCGGCGGTTATCTGGATCGAAGGCCAGTCGGCGCCGGTGCGGTTGCGGGCCTGCACC 360
phi297_C4.2    GGGGCGGCGGTTATCTGGATCGAAGGCCAGTCGGCGCCGGTGCGGTTGCGGGCCTGCACC 360
                *****   *****   *****   *****   *****

bci          GCGGTACCTGA 372
phi297_NC_016762.1 GCGATCTCCTGA 372
phi297_B1.2    GCGATCTCCTGA 372
phi297_B2.1    GCGATCTCCTGA 372
phi297_C4.2    GC----- 362
                **

```

**Figure S3.** Multiple alignment of the *bci* gene sequence and the BLAST products. Gene sequence of the *bci* gene was taken from the AUS531phi phage [38].

```

bci          MLILTRRPGETLHIGDNIITVTLGSQGDQVRLGITAPDDVAIHRSEIYQQIGNVRPVPPA 60
phi297_NC_016762.1 MLILTRRPGETLHIGDNIITVTLSSQGDQVRLGITAPDDVAIHRSEIYQQIGNVRPVPPA 60
phi297_B1.2    MLILTRRVGETLHIGDNIITVTLGSQGDQVRLGITAPDDVAIHRSEIYQQIGNVRPVPPA 60
phi297_B2.1    MLILTRRVGETLHIGDNIITVTLGSQGDQVRLGITAPDDVAIHRSEIYQQIGNVRPVPPA 60
phi297_C4.2    MLILTRRPGETLHIGDNIITVTLGSQGDQVRLGITAPDDVAIHRSEIYQQIGNVRPVPPA 60
                *****   *****   *****   *****   *****

bci          ELVEAWNREHPAPALIEYRPYGAEPQRTTVGRASVSLGGAAVIWI EGQSAPVALRACT 120
phi297_NC_016762.1 ELVEAWNREHPAPALIEYRPYGAEPQRTTVGRASVSLGGAAVIWI EGQSAPVALRSCT 120
phi297_B1.2    ELVEAWNREHPAPALIEYRPYGAEPQRTTVGRASVSLGGAAVIWI EGQSAPVALRACA 120
phi297_B2.1    ELVEAWNREHPAPALIEYRPYGAEPQRTTVGRASVSLGGAAVIWI EGQSAPVALRACA 120
phi297_C4.2    ELVEAWNREHPAPALIEYRPYGAEPQRTTVGRASVSLGGAAVIWI EGQSAPVALRACT 120
                *****   *****   *****   *****   *****

bci          AVT* 123
phi297_NC_016762.1 AIS* 123
phi297_B1.2    AIS* 123
phi297_B2.1    AIS* 123
phi297_C4.2    --- 120

```

**Figure S4.** Multiples alignment of the protein sequence of the *bci* gene. The *bci* protein sequence was taken from the AUS531phi phage [38].

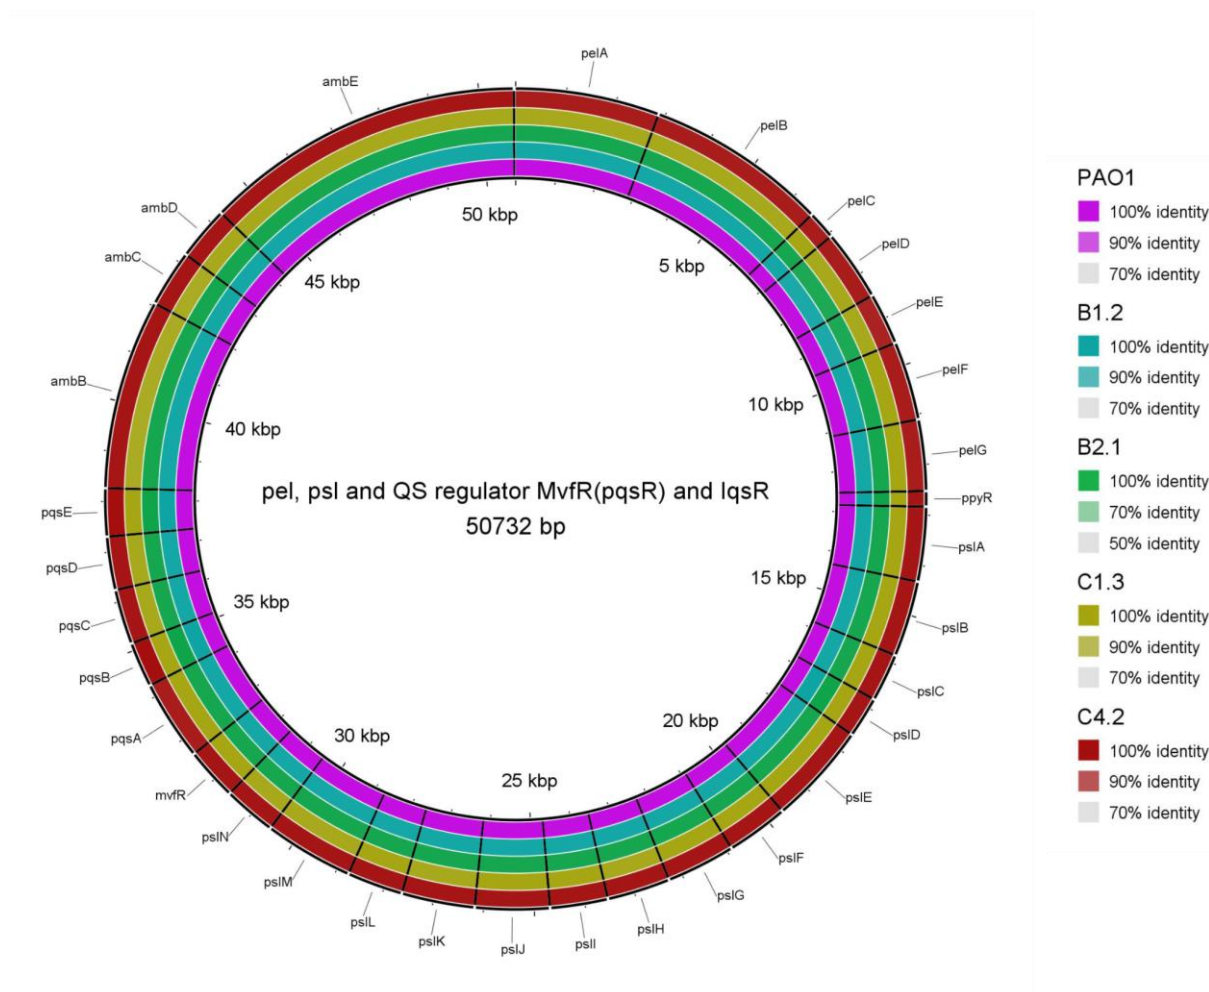

**Figure S5.** Presence and absence of the *pel*, *psl* locus, the *psl* operon pyoverdine operon regulator *ppyr*, the multiple virulence factor regulator (*MvfR* also known as *pqsR*, quorum sensing regulator) including the *pqs* operon and the *amb* operon belonging to the *IqsR* QS system. Blast Ring Image Generator (BRIG) was used for the multiple comparison of the presence and absence of the tested genes taken from the PAO1 reference strain against the washing machine isolates.

**Table S2.** List of virulence and biofilm-associated genes used for BRIG analysis. Gene sequences were downloaded from the Virulence factors of Pathogenic Bacteria DataBase (VFDB) and from NCBI. All Sequences were taken from the PAO1 reference strain except for the *exoU*, which is not present in PAO1, was taken from PA14.

| Gene                                                            | Locus tag (PAO1) | Function                                       |
|-----------------------------------------------------------------|------------------|------------------------------------------------|
| <b>Virulence factors of Pathogenic Bacteria DataBase (VFDB)</b> |                  |                                                |
| alg44                                                           | PA3542           | Biofilm - Alginate (Mucoide exopolysaccharide) |
| alg8                                                            | PA3541           | Biofilm - Alginate (Mucoide exopolysaccharide) |
| algA                                                            | PA3551           | Biofilm - Alginate (Mucoide exopolysaccharide) |
| algC                                                            | PA5322           | Biofilm - Alginate (Mucoide exopolysaccharide) |
| algD                                                            | PA3540           | Biofilm - Alginate (Mucoide exopolysaccharide) |
| algE                                                            | PA3544           | Biofilm - Alginate (Mucoide exopolysaccharide) |

|            |              |                                                                                |
|------------|--------------|--------------------------------------------------------------------------------|
| algF       | PA3550       | Biofilm - Alginate (Muroid exopolysaccharide)                                  |
| algG       | PA3545       | Biofilm - Alginate (Muroid exopolysaccharide)                                  |
| algI       | PA3548       | Biofilm - Alginate (Muroid exopolysaccharide)                                  |
| algJ       | PA3549       | Biofilm - Alginate (Muroid exopolysaccharide)                                  |
| algK       | PA3543       | Biofilm - Alginate (Muroid exopolysaccharide)                                  |
| algL       | PA3547       | Biofilm - Alginate (Muroid exopolysaccharide)                                  |
| algP/algR3 | PA5253       | Biofilm - Alginate (Muroid exopolysaccharide)                                  |
| algQ       | PA5255       | Biofilm - Alginate (Muroid exopolysaccharide)                                  |
| algR       | PA5261       | Biofilm - Alginate (Muroid exopolysaccharide)                                  |
| algU       | PA0762       | Biofilm - Alginate (Muroid exopolysaccharide)                                  |
| algW       | PA4446       | Biofilm - Alginate (Muroid exopolysaccharide)                                  |
| algX       | PA3546       | Biofilm - Alginate (Muroid exopolysaccharide)                                  |
| algZ       | PA5262       | Biofilm - Alginate (Muroid exopolysaccharide)                                  |
| aprA       | PA1249       | Exoenzyme - Alkaline protease                                                  |
| chpA       | PA0413       | Adherence - TypeIV pili                                                        |
| chpB       | PA0414       | Adherence - TypeIV pili                                                        |
| chpC       | PA0415       | Adherence - TypeIV pili                                                        |
| chpD       | PA0416       | Adherence - TypeIV pili                                                        |
| chpE       | PA0417       | Adherence - TypeIV pili                                                        |
| clpV1      | PA0090       | Effector delivery system - Hcp secretion island I (HSI-1)                      |
| clpV2      | PA1662       | Effector delivery system - Hcp secretion island II (HSI-2)                     |
| clpV3      | PA2371       | Effector delivery system - Hcp secretion island III (HSI-3)                    |
| dotU1      | PA0078       | Effector delivery system - Hcp secretion island I (HSI-1)                      |
| dotU2      | PA1668       | Effector delivery system - Hcp secretion island II (HSI-2)                     |
| dotU3      | PA2362       | Effector delivery system - Hcp secretion island III (HSI-3)                    |
| exoS       | PA3841       | Effector delivery system - Type III secretion system (TTSS) secreted effectors |
| exoT       | PA0044       | Effector delivery system - Type III secretion system (TTSS) secreted effectors |
| exoU       | PA14_RS20960 | Effector delivery system - Type III secretion system (TTSS) secreted effectors |
| exoY       | PA2191       | Effector delivery system - Type III secretion system (TTSS) secreted effectors |
| exsA       | PA1713       | Effector delivery system - Type III secretion system (TTSS)                    |
| exsB       | PA1712       | Effector delivery system - Type III secretion system (TTSS)                    |
| exsC       | PA1710       | Effector delivery system - Type III secretion system (TTSS)                    |

|           |        |                                                             |
|-----------|--------|-------------------------------------------------------------|
| exsD      | PA1714 | Effector delivery system - Type III secretion system (TTSS) |
| exsE      | PA1711 | Effector delivery system - Type III secretion system (TTSS) |
| fha1      | PA0081 | Effector delivery system - Hcp secretion island I (HSI-1)   |
| fimT      | PA4549 | Adherence - TypeIV pili                                     |
| fimU      | PA4550 | Adherence - TypeIV pili                                     |
| fimV      | PA3115 | Adherence - TypeIV pili                                     |
| fleI/flag | PA1093 | Motility - Flagella                                         |
| fleN      | PA1454 | Motility - Flagella                                         |
| fleP/fliT | PA1096 | Motility - Flagella                                         |
| fleQ      | PA1097 | Motility - Flagella                                         |
| fleR      | PA1099 | Motility - Flagella                                         |
| fleS      | PA1098 | Motility - Flagella                                         |
| flgA      | PA3350 | Motility - Flagella                                         |
| flgB      | PA1077 | Motility - Flagella                                         |
| flgC      | PA1078 | Motility - Flagella                                         |
| flgD      | PA1079 | Motility - Flagella                                         |
| flgE      | PA1080 | Motility - Flagella                                         |
| flgF      | PA1081 | Motility - Flagella                                         |
| flgG      | PA1082 | Motility - Flagella                                         |
| flgH      | PA1083 | Motility - Flagella                                         |
| flgI      | PA1084 | Motility - Flagella                                         |
| flgJ      | PA1085 | Motility - Flagella                                         |
| flgK      | PA1086 | Motility - Flagella                                         |
| flgL      | PA1087 | Motility - Flagella                                         |
| flgM      | PA3351 | Motility - Flagella                                         |
| flgN      | PA3352 | Motility - Flagella                                         |
| flhA      | PA1452 | Motility - Flagella                                         |
| flhB      | PA1449 | Motility - Flagella                                         |
| flhF      | PA1453 | Motility - Flagella                                         |
| fliA      | PA1455 | Motility - Flagella                                         |
| fliC      | PA1092 | Motility - Flagella                                         |
| fliD      | PA1094 | Motility - Flagella                                         |

|                 |        |                                                                            |
|-----------------|--------|----------------------------------------------------------------------------|
| fliE            | PA1100 | Motility - Flagella                                                        |
| fliF            | PA1101 | Motility - Flagella                                                        |
| fliG            | PA1102 | Motility - Flagella                                                        |
| fliH            | PA1103 | Motility - Flagella                                                        |
| fliI            | PA1104 | Motility - Flagella                                                        |
| fliJ            | PA1105 | Motility - Flagella                                                        |
| fliK            | PA1441 | Motility - Flagella                                                        |
| fliL            | PA1442 | Motility - Flagella                                                        |
| fliM            | PA1443 | Motility - Flagella                                                        |
| fliN            | PA1444 | Motility - Flagella                                                        |
| fliO            | PA1445 | Motility - Flagella                                                        |
| fliP            | PA1446 | Motility - Flagella                                                        |
| fliQ            | PA1447 | Motility - Flagella                                                        |
| fliR            | PA1448 | Motility - Flagella                                                        |
| fliS            | PA1095 | Motility - Flagella                                                        |
| fptA            | PA4221 | Nutritional/Metabolic factor - Pyochelin                                   |
| fpvA            | PA2398 | Nutritional/Metabolic factor - Pyoverdine                                  |
| gacA            | PA2586 | Regulation - GacS/GacA two-component system                                |
| gacS            | PA0928 | Regulation - GacS/GacA two-component system                                |
| hcnA            | PA2193 | Antimicrobial activity/Competitive advantage - Hydrogen cyanide production |
| hcnB            | PA2194 | Antimicrobial activity/Competitive advantage - Hydrogen cyanide production |
| hcnC            | PA2195 | Antimicrobial activity/Competitive advantage - Hydrogen cyanide production |
| hcp1            | PA0085 | Effector delivery system - Hcp secretion island I (HSI-1)                  |
| hcp2            | PA1512 | Effector delivery system - Hcp secretion island II (HSI-2)                 |
| hcp3            | PA2367 | Effector delivery system - Hcp secretion island III (HSI-3)                |
| hdtS            | PA0005 | Biofilm - Acylhomoserine lactone synthase                                  |
| hisF2           | PA3151 | Biofilm - Acylhomoserine lactone synthase                                  |
| hisH2           | PA3152 | Immune modulation - LPS                                                    |
| hsiA1           | PA0082 | Effector delivery system - Hcp secretion island I (HSI-1)                  |
| hsiA2           | PA1656 | Effector delivery system - Hcp secretion island II (HSI-2)                 |
| hsiA3           | PA2360 | Effector delivery system - Hcp secretion island III (HSI-3)                |
| hsiB1/vipA/tssB | PA0083 | Effector delivery system - Hcp secretion island I (HSI-1)                  |

|                 |        |                                                             |
|-----------------|--------|-------------------------------------------------------------|
| hsiB2           | PA1657 | Effector delivery system - Hcp secretion island II (HSI-2)  |
| hsiB3           | PA2365 | Effector delivery system - Hcp secretion island III (HSI-3) |
| hsiC1/vipB/tssC | PA0084 | Effector delivery system - Hcp secretion island I (HSI-1)   |
| hsiC2           | PA1658 | Effector delivery system - Hcp secretion island II (HSI-2)  |
| hsiC3           | PA2366 | Effector delivery system - Hcp secretion island III (HSI-3) |
| hsiE1           | PA0086 | Effector delivery system - Hcp secretion island I (HSI-1)   |
| hsiF1/tssE      | PA0087 | Effector delivery system - Hcp secretion island I (HSI-1)   |
| hsiF2           | PA1659 | Effector delivery system - Hcp secretion island II (HSI-2)  |
| hsiF3           | PA2368 | Effector delivery system - Hcp secretion island III (HSI-3) |
| hsiG1/tssf      | PA0088 | Effector delivery system - Hcp secretion island I (HSI-1)   |
| hsiG2           | PA1660 | Effector delivery system - Hcp secretion island II (HSI-2)  |
| hsiG3           | PA2369 | Effector delivery system - Hcp secretion island III (HSI-3) |
| hsiH1           | PA0089 | Effector delivery system - Hcp secretion island I (HSI-1)   |
| hsiH2           | PA1661 | Effector delivery system - Hcp secretion island II (HSI-2)  |
| hsiH3           | PA2370 | Effector delivery system - Hcp secretion island III (HSI-3) |
| hsiJ1           | PA0079 | Effector delivery system - Hcp secretion island I (HSI-1)   |
| hsiJ2           | PA1667 | Effector delivery system - Hcp secretion island II (HSI-2)  |
| hsiJ3           | PA2363 | Effector delivery system - Hcp secretion island III (HSI-3) |
| icmF1/tssM1     | PA0077 | Effector delivery system - Hcp secretion island I (HSI-1)   |
| icmF2           | PA1669 | Effector delivery system - Hcp secretion island II (HSI-2)  |
| icmF3           | PA2361 | Effector delivery system - Hcp secretion island III (HSI-3) |
| lasA            | PA1871 | Effector delivery system - LasA (Elastase)                  |
| lasB            | PA3724 | Effector delivery system - LasB (Elastase)                  |
| lasI            | PA1432 | Biofilm - Quorum sensing                                    |
| lasR            | PA1430 | Biofilm - Quorum sensing                                    |
| lip1            | PA0080 | Effector delivery system - Hcp secretion island I (HSI-1)   |
| lip2            | PA1666 | Effector delivery system - Hcp secretion island II (HSI-2)  |
| motA            | PA4954 | Motility - Flagella                                         |
| motB            | PA4953 | Motility - Flagella                                         |
| motC            | PA1460 | Motility - Flagella                                         |
| motD            | PA1461 | Motility - Flagella                                         |
| motY            | PA3526 | Motility - Flagella                                         |

|        |        |                                                             |
|--------|--------|-------------------------------------------------------------|
| mucA   | PA0763 | Biofilm - Alginate (Muroid exopolysaccharide)               |
| mucB   | PA0764 | Biofilm - Alginate (Muroid exopolysaccharide)               |
| mucC   | PA0765 | Biofilm - Alginate (Muroid exopolysaccharide)               |
| mucD   | PA0766 | Biofilm - Alginate (Muroid exopolysaccharide)               |
| mucE   | PA4033 | Biofilm - Alginate (Muroid exopolysaccharide)               |
| mucP   | PA3649 | Biofilm - Alginate (Muroid exopolysaccharide)               |
| PA3142 | PA3142 | Immune modulation - LPS                                     |
| PA3143 | PA3143 | Immune modulation - LPS                                     |
| PA3157 | PA3157 | Immune modulation - LPS                                     |
| pchA   | PA4231 | Nutritional/Metabolic factor - Pyochelin                    |
| pchB   | PA4230 | Nutritional/Metabolic factor - Pyochelin                    |
| pchC   | PA4229 | Nutritional/Metabolic factor - Pyochelin                    |
| pchD   | PA4228 | Nutritional/Metabolic factor - Pyochelin                    |
| pchE   | PA4226 | Nutritional/Metabolic factor - Pyochelin                    |
| pchF   | PA4225 | Nutritional/Metabolic factor - Pyochelin                    |
| pchG   | PA4224 | Nutritional/Metabolic factor - Pyochelin                    |
| pchH   | PA4223 | Nutritional/Metabolic factor - Pyochelin                    |
| pchI   | PA4222 | Nutritional/Metabolic factor - Pyochelin                    |
| pchR   | PA4227 | Nutritional/Metabolic factor - Pyochelin                    |
| pcr1   | PA1699 | Effector delivery system - Type III secretion system (TTSS) |
| pcr2   | PA1700 | Effector delivery system - Type III secretion system (TTSS) |
| pcr3   | PA1701 | Effector delivery system - Type III secretion system (TTSS) |
| pcr4   | PA1702 | Effector delivery system - Type III secretion system (TTSS) |
| pcrD   | PA1703 | Effector delivery system - Type III secretion system (TTSS) |
| pcrG   | PA1705 | Effector delivery system - Type III secretion system (TTSS) |
| pcrH   | PA1707 | Effector delivery system - Type III secretion system (TTSS) |
| pcrR   | PA1704 | Effector delivery system - Type III secretion system (TTSS) |
| pcrV   | PA1706 | Effector delivery system - Type III secretion system (TTSS) |
| phzA1  | PA4210 | Nutritional/Metabolic factor - Pyocyanin                    |
| phzA2  | PA1899 | Nutritional/Metabolic factor - Pyocyanin                    |
| phzB1  | PA4211 | Nutritional/Metabolic factor - Pyocyanin                    |
| phzB2  | PA1900 | Nutritional/Metabolic factor - Pyocyanin                    |

|       |         |                                          |
|-------|---------|------------------------------------------|
| phzC1 | PA4212  | Nutritional/Metabolic factor - Pyocyanin |
| phzC2 | PA1901  | Nutritional/Metabolic factor - Pyocyanin |
| phzD1 | PA4213  | Nutritional/Metabolic factor - Pyocyanin |
| phzD2 | PA1902  | Nutritional/Metabolic factor - Pyocyanin |
| phzE1 | PA4214  | Nutritional/Metabolic factor - Pyocyanin |
| phzE2 | PA1903  | Nutritional/Metabolic factor - Pyocyanin |
| phzF1 | PA4215  | Nutritional/Metabolic factor - Pyocyanin |
| phzF2 | PA1904  | Nutritional/Metabolic factor - Pyocyanin |
| phzG1 | PA4216  | Nutritional/Metabolic factor - Pyocyanin |
| phzG2 | PA1905  | Nutritional/Metabolic factor - Pyocyanin |
| phzH  | PA0051  | Nutritional/Metabolic factor - Pyocyanin |
| phzM  | PA4209  | Nutritional/Metabolic factor - Pyocyanin |
| phzS  | PA4217  | Nutritional/Metabolic factor - Pyocyanin |
| pilA  | PA4525  | Adherence - TypeIV pili                  |
| pilB  | PA4526  | Adherence - TypeIV pili                  |
| pilC  | PA4527* | Adherence - TypeIV pili                  |
| pilE  | PA4556  | Adherence - TypeIV pili                  |
| pilF  | PA3805  | Adherence - TypeIV pili                  |
| pilG  | PA0408  | Adherence - TypeIV pili                  |
| pilH  | PA0409  | Adherence - TypeIV pili                  |
| pilI  | PA0410  | Adherence - TypeIV pili                  |
| pilJ  | PA0411  | Adherence - TypeIV pili                  |
| pilK  | PA0412  | Adherence - TypeIV pili                  |
| pilM  | PA5044  | Adherence - TypeIV pili                  |
| pilN  | PA5043  | Adherence - TypeIV pili                  |
| pilO  | PA5042  | Adherence - TypeIV pili                  |
| pilP  | PA5041  | Adherence - TypeIV pili                  |
| pilQ  | PA5040  | Adherence - TypeIV pili                  |
| pilR  | PA4547  | Adherence - TypeIV pili                  |
| pilS  | PA4546  | Adherence - TypeIV pili                  |
| pilT  | PA0395  | Adherence - TypeIV pili                  |
| pilU  | PA0396  | Adherence - TypeIV pili                  |

|            |        |                                                             |
|------------|--------|-------------------------------------------------------------|
| pilV       | PA4551 | Adherence - TypeIV pili                                     |
| pilW       | PA4552 | Adherence - TypeIV pili                                     |
| pilX       | PA4553 | Adherence - TypeIV pili                                     |
| pilY1      | PA4554 | Adherence - TypeIV pili                                     |
| pilY2      | PA4555 | Adherence - TypeIV pili                                     |
| pilZ       | PA2960 | Adherence - TypeIV pili                                     |
| plcB       | PA0026 | Exotoxin - Phospholipase X                                  |
| plcH       | PA0844 | Exotoxin - Phospholipase C                                  |
| plcN       | PA3319 | Exotoxin - Non-hemolytic phospholipase C                    |
| pldA/tle5a | PA3487 | Effector delivery system - HSI-2 T6SS secreted effectors    |
| popB       | PA1708 | Effector delivery system - Type III secretion system (TTSS) |
| popD       | PA1709 | Effector delivery system - Type III secretion system (TTSS) |
| popN       | PA1698 | Effector delivery system - Type III secretion system (TTSS) |
| ppkA       | PA0074 | Effector delivery system - Hcp secretion island I (HSI-1)   |
| pppA       | PA0075 | Effector delivery system - Hcp secretion island I (HSI-1)   |
| prpL       | PA4175 | Exoenzyme - Protease IV                                     |
| pscB       | PA1715 | Type III secretion system (TTSS)                            |
| pscC       | PA1716 | Type III secretion system (TTSS)                            |
| pscD       | PA1717 | Type III secretion system (TTSS)                            |
| pscE       | PA1718 | Type III secretion system (TTSS)                            |
| pscF       | PA1719 | Type III secretion system (TTSS)                            |
| pscG       | PA1720 | Type III secretion system (TTSS)                            |
| pscH       | PA1721 | Type III secretion system (TTSS)                            |
| pscI       | PA1722 | Type III secretion system (TTSS)                            |
| pscJ       | PA1723 | Type III secretion system (TTSS)                            |
| pscK       | PA1724 | Type III secretion system (TTSS)                            |
| pscL       | PA1725 | Type III secretion system (TTSS)                            |
| pscN       | PA1697 | Type III secretion system (TTSS)                            |
| pscO       | PA1696 | Type III secretion system (TTSS)                            |
| pscP       | PA1695 | Type III secretion system (TTSS)                            |
| pscQ       | PA1694 | Type III secretion system (TTSS)                            |
| pscR       | PA1693 | Type III secretion system (TTSS)                            |

|           |        |                                                                                     |
|-----------|--------|-------------------------------------------------------------------------------------|
| pscS      | PA1692 | Type III secretion system (TTSS)                                                    |
| pscT      | PA1691 | Type III secretion system (TTSS)                                                    |
| pscU      | PA1690 | Type III secretion system (TTSS)                                                    |
| pvdA      | PA2386 | Nutritional/Metabolic factor - Pyoverdine                                           |
| pvdD      | PA2399 | Nutritional/Metabolic factor - Pyoverdine                                           |
| pvdE      | PA2397 | Nutritional/Metabolic factor - Pyoverdine                                           |
| pvdF      | PA2396 | Nutritional/Metabolic factor - Pyoverdine                                           |
| pvdG      | PA2425 | Nutritional/Metabolic factor - Pyoverdine                                           |
| pvdH      | PA2413 | Nutritional/Metabolic factor - Pyoverdine                                           |
| pvdI      | PA2402 | Nutritional/Metabolic factor - Pyoverdine                                           |
| pvdJ      | PA2400 | Nutritional/Metabolic factor - Pyoverdine                                           |
| pvdL      | PA2424 | Nutritional/Metabolic factor - Pyoverdine                                           |
| pvdM      | PA2393 | Nutritional/Metabolic factor - Pyoverdine                                           |
| pvdN      | PA2394 | Nutritional/Metabolic factor - Pyoverdine                                           |
| pvdO      | PA2395 | Nutritional/Metabolic factor - Pyoverdine                                           |
| pvdP      | PA2392 | Nutritional/Metabolic factor - Pyoverdine                                           |
| pvdQ      | PA2385 | Nutritional/Metabolic factor - Pyoverdine                                           |
| pvdS      | PA2426 | Nutritional/Metabolic factor - Pyoverdine                                           |
| pvdY      | PA2427 | Nutritional/Metabolic factor - Pyoverdine                                           |
| rhlA      | PA3479 | Immune modulation - Rhamnolipid                                                     |
| rhlB      | PA3478 | Immune modulation - Rhamnolipid                                                     |
| rhlC      | PA1130 | Immune modulation - Rhamnolipid                                                     |
| rhlI      | PA3476 | Biofilm - Quorum sensing                                                            |
| rhlR      | PA3477 | Biofilm - Quorum sensing                                                            |
| tagF/pppB | PA0076 | Effector delivery system - Hcp secretion island I (HSI-1)                           |
| tagR      | PA0071 | Effector delivery system - Hcp secretion island I (HSI-1)                           |
| tagS      | PA0072 | Effector delivery system - Hcp secretion island I (HSI-1)                           |
| tagT      | PA0073 | Effector delivery system - Hcp secretion island I (HSI-1)                           |
| toxA      | PA1148 | Exotoxin - Exotoxin A                                                               |
| tse1      | PA1844 | Effector delivery system - Hcp secretion island I (HSI-1) - T6SS secreted effectors |
| tse2      | PA2702 | Effector delivery system - Hcp secretion island I (HSI-1) - T6SS secreted effectors |
| tse3      | PA3484 | Effector delivery system - Hcp secretion island I (HSI-1) - T6SS secreted effectors |

|             |        |                                                                                  |
|-------------|--------|----------------------------------------------------------------------------------|
| vgrG1a      | PA0091 | Effector delivery system - Hcp secretion island I (HSI-1)                        |
| vgrG2       | PA1511 | Effector delivery system - Hcp secretion island II (HSI-2)                       |
| vgrG3       | PA2373 | Effector delivery system - Hcp secretion island III (HSI-3)                      |
| waaA        | PA4988 | Immune modulation - LPS                                                          |
| waaC        | PA5011 | Immune modulation - LPS                                                          |
| waaF        | PA5012 | Immune modulation - LPS                                                          |
| waaG        | PA5010 | Immune modulation - LPS                                                          |
| waaP        | PA5009 | Immune modulation - LPS                                                          |
| wbpA        | PA3159 | Immune modulation - LPS                                                          |
| wbpB        | PA3158 | Immune modulation - LPS                                                          |
| wbpD        | PA3156 | Immune modulation - LPS                                                          |
| wbpE        | PA3155 | Immune modulation - LPS                                                          |
| wbpG        | PA3150 | Immune modulation - LPS                                                          |
| wbpH        | PA3149 | Immune modulation - LPS                                                          |
| wbpI        | PA3148 | Immune modulation - LPS                                                          |
| wbpJ        | PA3147 | Immune modulation - LPS                                                          |
| wbpK        | PA3146 | Immune modulation - LPS                                                          |
| wbpL        | PA3145 | Immune modulation - LPS                                                          |
| wbpM        | PA3141 | Immune modulation - LPS                                                          |
| wzx         | PA3153 | Immune modulation - LPS                                                          |
| wzy         | PA3154 | Immune modulation - LPS                                                          |
| wzz         | PA3160 | Immune modulation - LPS                                                          |
| xcpA/pilD   | PA4528 | Adherence - TypeIV pili                                                          |
| <b>NCBI</b> |        |                                                                                  |
| pelA        | PA3064 | Biofilm - hypothetical protein                                                   |
| pelB        | PA3063 | Biofilm - pellicle/biofilm biosynthesis protein PelB                             |
| pelC        | PA3062 | Biofilm - pellicle/biofilm biosynthesis outer membrane protein PelC              |
| pelD        | PA3061 | Biofilm - pellicle/biofilm biosynthesis protein PelD                             |
| pelE        | PA3060 | Biofilm - pellicle/biofilm biosynthesis protein PelE                             |
| pelF        | PA3059 | Biofilm - pellicle/biofilm biosynthesis glycosyltransferase PelF                 |
| pelG        | PA3058 | Biofilm - pellicle/biofilm biosynthesis Wzx-like polysaccharide transporter PelG |
| ppyR        | PA2663 | Biofilm - psl and pyoverdine operon regulator PpyR                               |

|      |        |                                                 |
|------|--------|-------------------------------------------------|
| pslA | PA2231 | Biofilm - biofilm formation protein PslA        |
| pslB | PA2232 | Biofilm - biofilm formation protein PslB        |
| pslC | PA2233 | Biofilm - biofilm formation protein PslC        |
| pslD | PA2234 | Biofilm - biofilm formation protein PslD        |
| pslE | PA2235 | Biofilm - biofilm formation protein PslE        |
| pslF | PA2236 | Biofilm - biofilm formation protein PslF        |
| pslG | PA2237 | Biofilm - biofilm formation protein PslG        |
| pslH | PA2238 | Biofilm - biofilm formation protein PslH        |
| pslI | PA2239 | Biofilm - biofilm formation protein PslI        |
| pslJ | PA2240 | Biofilm - biofilm formation protein PslJ        |
| pslK | PA2241 | Biofilm - biofilm formation protein PslL        |
| pslL | PA2242 | Biofilm - hypothetical protein                  |
| pslM | PA2243 | Biofilm - FAD-binding dehydrogenase             |
| pslN | PA2244 | Biofilm - hypothetical protein                  |
| mvfR | PA1003 | Quorum sensing - transcriptional regulator MvfR |
| pqsA | PA0996 | Quorum sensing - anthranilate--CoA ligase       |
| pqsB | PA0997 | Quorum sensing - hypothetical protein           |
| pqsC | PA0998 | Quorum sensing - hypothetical protein           |
| pqsD | PA0999 | Quorum sensing - 3-oxoacyl-ACP synthase         |
| pqsE | PA1000 | Quorum sensing - thioesterase PqsE              |
